# Supplementary material for: Cell Fate Reprogramming by Control of Intracellular Network Dynamics
Source: PLOS journal article supplement (doi:10.1371/journal.pcbi.1004193), 2015-04-07
Supplement: S7 (10.1371/journal.pcbi.1004193.s007) [file journal.pcbi.1004193.s007]

## Supporting Information

### S7 TEXT. PSEUDOCODE FOR THE STABLE MOTIF CONTROL ALGORITHM AND THE STABLE MOTIF BLOCKING ALGORITHM

For the pseudocodes we assume that one starts with a target attractor  $\mathcal{A}$ , the logical functions  $F = (f_1, f_2, \dots, f_N)$  for the logical network model of interest, and the stable motif succession diagram for the logical network model of interest (see Fig. 2). A stable motif succession diagram can be represented as a directed graph  $G_{diag} = (V_{diag}, E_{diag})$  together with a dictionary  $L$ . The nodes  $V_{diag} = (v_{diag,1}, v_{diag,2}, \dots, v_{diag,n})$  denote either stable motifs  $\mathcal{M}_i$  (if the node has at least one outgoing edge) or attractors  $\mathcal{A}_i$  (if the node has no outgoing edges). The dictionary  $L$  stores the type of object (stable motif or attractor) each node in  $V_{diag}$  denotes. Each edge in  $E_{diag}$  connects a stable motif with the stable motifs or attractors that can be obtained from the reduced network associated to it; if network reduction leads to a simplified network with at least one stable motif, then the edges points from the stable motif being considered to the stable motifs of the simplified network, otherwise, the edges point towards an attractor. It should be noted that stable motifs/attractors may be assigned to more than one node in  $V_{diag}$ . For example, in Fig. 2 there are three nodes that denote the motif  $\{A = 0\}$ , and two nodes that denote the attractor  $\mathcal{A}_2$ .

#### A. Pseudocode for the stable motif control algorithm

*Step 1:* Identify the sequences of stable motifs that lead to  $\mathcal{A}$ . These can be obtained from the stable motif succession diagram (see Fig. 2) by choosing the attractor of interest in the right-most part and selecting all of the attractor's predecessors in the succession diagram. The stable motif diagram is represented by the directed graph  $G_{diag} = (V_{diag}, E_{diag})$  together with the list  $L$ .

---

#### Algorithm 1: GETSEQUENCES( $G, L, \mathcal{A}$ )

---

**comment:** Sequences, SequencesLeft, and NewSequences are sets.  
 $\mathcal{S}$  is a sequence (ordered list).

$Sequences \leftarrow$  empty set

$SequencesLeft \leftarrow$  empty set

**for each**  $v \in$  sink nodes of  $G$

**comment:**  $L(v)$  gives the motif or attractor denoted by  $v$ .  
**do**  $\left\{ \begin{array}{l} \text{if } L(v) \text{ equals } \mathcal{A} \\ \text{then } \left\{ \begin{array}{l} \mathcal{S} \leftarrow \text{empty sequence} \\ \text{add } v \text{ to the beginning of } \mathcal{S} \\ \text{add } \mathcal{S} \text{ to } SequencesLeft \end{array} \right. \end{array} \right.$

**repeat**

$NewSequences \leftarrow$  empty set  
**for each**  $\mathcal{S} \in SequencesLeft$   
 $\left\{ \begin{array}{l} v \leftarrow \text{first item of } \mathcal{S} \\ \text{if } v \text{ has input nodes} \\ \text{do } \left\{ \begin{array}{l} \text{for each } v' \in \text{input nodes of } v \\ \text{then } \left\{ \begin{array}{l} \mathcal{S}' \leftarrow \text{copy } \mathcal{S} \\ \text{add } v' \text{ to the beginning of } \mathcal{S}' \\ \text{add } \mathcal{S}' \text{ to } NewSequences \end{array} \right. \\ \text{else add } \mathcal{S} \text{ to } Sequences \\ \text{remove } \mathcal{S} \text{ from } SequencesLeft \end{array} \right. \end{array} \right.$

**for each**  $\mathcal{S}' \in NewSequences$   
 $\text{do add } \mathcal{S}' \text{ to } SequencesLeft$

**until**  $NewSequences$  is empty

**return** ( $Sequences$ )

---

*Step 2:* Shorten each sequence  $\mathcal{S} \in Sequences$  by identifying the minimum number of motifs in  $\mathcal{S}$  required for reaching  $\mathcal{A}$  and removing the remaining motifs from the sequence. This minimum number of motifs can be identified from the stable motif succession diagram (Fig. 2); they are the motifs after which all consequent motif choices lead to the same attractor  $\mathcal{A}$ .

---

**Algorithm 2:** SHORTENSEQUENCES1( $G, L, \mathcal{A}, Sequences$ )

---

**comment:** *ShortenedSequences1* is a set.  
 $\mathcal{S}'$  is a sequence (ordered list).  
 $pathFound$  is a Boolean variable  
 $ShortenedSequences1 \leftarrow$  empty set  
**for each**  $\mathcal{S} \in Sequences$   
     $\mathcal{S}' \leftarrow$  copy  $\mathcal{S}$   
    **for each**  $v \in \mathcal{S}$  in reverse order  
         $pathFound \leftarrow$  **false**  
        **for**  $v' \in$  sink nodes of  $G$   
            **comment:**  $L(v')$  gives the motif or attractor denoted by  $v'$ .  
            **if**  $L(v')$  is not  $\mathcal{A}$   
                **if** there exists a directed path from  $v$  to  $v'$   
                    **then**  $\begin{cases} pathFound \leftarrow \text{true} \\ \text{exit for loop} \end{cases}$   
                **if**  $pathFound$   
                    **then** exit **for** loop  
                    **else** remove  $v$  from  $\mathcal{S}'$   
    **if**  $ShortenedSequences1$  does not contain  $\mathcal{S}'$   
        **then** add  $\mathcal{S}'$  to  $ShortenedSequences1$   
**return** ( $ShortenedSequences1$ )

---

*Step 3:* For each stable motif state  $\mathcal{M} = (\sigma_{m_1} = b_{m_1}, \sigma_{m_2} = b_{m_2}, \dots, \sigma_{m_l} = b_{m_l})$  corresponding to node  $v$ , find the subsets of stable motif's states  $O = \{M_i\}, M_i \subseteq \mathcal{M}$  that, when fixed in the logical model, are enough to force the state of the whole motif into  $\mathcal{M}$ . At worst, there will only be one subset, which will equal the whole stable motif state  $\mathcal{M}$ . If any of these subsets is fully contained in another subset, remove the larger of the subsets. In each stable motif sequence  $\mathcal{S} = (\mathcal{M}_1, \dots, \mathcal{M}_L)$ , substitute every stable motif  $\mathcal{M}_j$  with the subsets of the stable motif states obtained, that is,  $\mathcal{S} = (O_1, \dots, O_L)$ .

---

**Algorithm 3:** SEQUENCESWITHMOTIFCONTROLSETS(*ShortenedSequences1*, *SequenceDictionary*,  $F$ ,  $L$ )

---

**comment:**  $F = (f_1, f_2, \dots, f_N)$  contains the Boolean functions of the logical model.  
*ShortenedSequences2* is a set.  
 $O$  and *Subsequence* are sequences (ordered lists).  
*ShortenedSequences2*  $\leftarrow$  empty set  
**for each**  $\mathcal{S} \in \text{ShortenedSequences1}$   
    **comment:** *index* is an integer. It stores the index of the first element of  $\mathcal{S}'$   
        that will be visited in the **for** loop below.  
         $\mathcal{S}'$  and  $\mathcal{S}''$  are sequences (ordered lists).  
         $F'$  is a sequence (ordered list) of Boolean functions.  
    *index*  $\leftarrow$  0  
     $\mathcal{S}' \leftarrow$  sequence assigned to  $\mathcal{S}$  in *SequenceDictionary*  
     $\mathcal{S}'' \leftarrow$  empty sequence  
     $F' \leftarrow$  copy  $F$   
    **for each**  $v \in \mathcal{S}$   
        **comment:**  $\mathcal{S}'$  has more motifs than  $\mathcal{S}$ ,  
            we need the extra motifs to find the reduced network from which the motif  
             $L(v)$  was obtained. These extra motifs are stored in *Subsequence*  
        *Subsequence*  $\leftarrow$  empty sequence  
        **for**  $i \leftarrow \text{index}$  **to** length of list  $\mathcal{S}' - 1$   
             $v' \leftarrow$  get element of  $\mathcal{S}'$  in position  $i$   
            **if**  $v'$  equals  $v$   
                **do**  $\left\{ \begin{array}{l} \text{then } \left\{ \begin{array}{l} \text{index} \leftarrow i + 1 \\ \text{exit for loop} \end{array} \right. \\ \text{add } v' \text{ to the end of } \textit{Subsequence} \end{array} \right.$   
            **comment:** DOWNSTREAMEFFECT( $L(v')$ ,  $F'$ ) is described in Algorithm 4.  
            DOWNSTREAMEFFECT( $L(v')$ ,  $F'$ ) evaluates the states of motif  $L(v')$  into  $F'$ .  
            If any  $f \in F'$  becomes a constant Boolean function after the evaluation,  
            it evaluates the resulting Boolean state of the node corresponding to  
             $f$  in every  $F'$ . This is done iteratively until no new constant Boolean  
            functions are found, at which point the resulting  $F'$  is returned.  
            **for each**  $v' \in \textit{Subsequence}$   
                **do**  $F' \leftarrow \text{DOWNSTREAMEFFECT}(L(v'), F')$   
            **comment:** MOTIFCONTROLSET( $L(v)$ ,  $F'$ ) is described in Algorithm 5  
            MOTIFCONTROLSET( $L(v)$ ,  $F'$ ) finds the subsets of stable motif's states  
            of  $L(v)$  that, when fixed, are enough to force the state of the whole motif  
            into  $L(v)$ .  
             $O \leftarrow \text{MOTIFCONTROLSET}(L(v), F')$   
            add  $O$  to end of  $\mathcal{S}''$   
             $F' \leftarrow \text{DOWNSTREAMEFFECT}(L(v), F')$   
        add  $\mathcal{S}''$  to *ShortenedSequences2*  
**return** (*ShortenedSequences2*)

---

---

**Algorithm 4:** DOWNSTREAMEFFECT( $\mathcal{M}, F'$ )

---

**comment:** DOWNSTREAMEFFECT( $\mathcal{M}, F'$ ) evaluates the states of motif  $\mathcal{M}$  into  $F'$ .  
 If any  $f \in F'$  becomes a constant Boolean function after the evaluation, it evaluates the resulting Boolean state of the node corresponding to  $f$  in every  $F'$ . This is done iteratively until no new constant Boolean functions are found, at which point the resulting  $F'$  is returned.  
 $M'$  and  $M''$  are sets containing nodes in the logical model together with a Boolean variable with their state.  
 $F''$  is a sequence (ordered lists) of Boolean functions.  
 $M' \leftarrow$  empty set;  $M'' \leftarrow$  copy  $M$ ;  $F'' \leftarrow$  copy  $F'$   
**repeat**  
   **for each**  $f \in F''$   
     **if**  $f$  is not a constant Boolean function  
       **do**  $f \leftarrow f$  with the states in  $M'$  evaluated on it  
       **if**  $f$  is a constant Boolean function  
         **then**  $\left\{ \begin{array}{l} \textbf{comment: } \sigma \text{ is a node in the logical model together} \\ \text{with a Boolean variable with its state.} \\ \sigma \leftarrow \text{node in the logical model whose function is } f \text{ and} \\ \text{the value of } f \text{ as its state.} \\ \text{add } \sigma \text{ to } M'' \end{array} \right.$   
       **then**  $\left\{ \begin{array}{l} \textbf{comment: } \sigma \text{ is a node in the logical model together} \\ \text{with a Boolean variable with its state.} \\ \sigma \leftarrow \text{node in the logical model whose function is } f \text{ and} \\ \text{the value of } f \text{ as its state.} \\ \text{add } \sigma \text{ to } M'' \end{array} \right.$   
      $M' \leftarrow$  copy  $M''$   
      $M'' \leftarrow$  empty set  
**until**  $M'$  is empty  
**return** ( $F''$ )

---



---

**Algorithm 5:** MOTIFCONTROLSET( $\mathcal{M}, F'$ )

---

**comment:** MOTIFCONTROLSET( $\mathcal{M}, F'$ ) finds the subsets of stable motif's states of  $\mathcal{M}$  that, when fixed, are enough to force the state of the whole motif into  $\mathcal{M}$ .  
 $F'$  and  $F''$  are sequences (ordered lists) of Boolean functions.  
 $F'$  are the logical functions of the nodes in the model whose states are specified in  $\mathcal{M}$ .  
 $O$  is a sequence (ordered list).  
 $isMotifControlSet$  and  $validSubset$  are Boolean variables.  
 $O \leftarrow$  empty sequence  
**for**  $subsetSize \leftarrow 1$  **to** length of list  $\mathcal{M} - 1$   
   **for each**  $M \in$  subsets of size  $subsetSize$  in  $\mathcal{M}$   
      $validSubset \leftarrow$  **true**  
     **for each**  $M' \in O$   
       **do**  $\left\{ \begin{array}{l} \text{if } M' \text{ is a subset of } M \\ \text{then } \left\{ \begin{array}{l} validSubset \leftarrow \text{false} \\ \text{exit for loop} \end{array} \right. \end{array} \right.$   
       **if not**  $validSubset$   
         **then** exit **for** loop  
       **comment:** DOWNSTREAMEFFECT( $\mathcal{M}, F'$ ) is described in Algorithm 4.  
        $F'' \leftarrow$  DOWNSTREAMEFFECT( $\mathcal{M}, F'$ )  
        $isMotifControlSet \leftarrow$  **true**  
       **for each**  $f \in F''$   
         **do**  $\left\{ \begin{array}{l} \text{if } f \text{ is not a constant Boolean function} \\ \text{then } \left\{ \begin{array}{l} isMotifControlSet \leftarrow \text{false} \\ \text{exit for loop} \end{array} \right. \end{array} \right.$   
       **if**  $isMotifControlSet$   
         **then** add  $M$  to  $O$   
   **if**  $O$  is empty  
     **then** add  $\mathcal{M}$  to  $O$   
**return** ( $O$ )

---

*Step 4:* For each sequence  $\mathcal{S} = (O_1, \dots, O_L)$  create a set of states  $\mathcal{C}$  by choosing one of the subsets of stable motif states  $M_{k_j}$  in each  $O_j$  and taking their union, that is,  $\mathcal{C} = M_{k_1} \cup \dots \cup M_{k_L}, M_{k_j} \in O_j$ . The network control set for attractor  $\mathcal{A}$  is the set of states  $\mathcal{C}_{\mathcal{A}} = \{\mathcal{C}_i\}$  obtained from all possible combinations of  $M_{k_j}$ 's for every sequence  $\mathcal{S}$ . To avoid any redundancy, we additionally prune  $\mathcal{C}_{\mathcal{A}}$  of duplicates and remove the states  $\mathcal{C}_i$  which are supersets of any of the other states  $\mathcal{C}_j$  (i.e.  $\mathcal{C}_j \subset \mathcal{C}_i$ ).

---

**Algorithm 6:** STABLEMOTIFCONTROLSETS(*ShortenedSequences2*)

---

**comment:** *ControlSets*, *ControlSet*, and *M* are sets  
*O* is a sequence (ordered list).  
*L* and *index* are integers.  
*countArray* and *countArrayMax* are arrays of integers.

*ControlSets*  $\leftarrow$  empty set

**for each**  $\mathcal{S} \in \text{ShortenedSequences2}$

$L \leftarrow$  length of list  $\mathcal{S}$

**comment:** *countArray* and *countArrayMax* keep track of the combinations of motifs in  $\mathcal{S}$  that we have tried and that we have left.

*countArray*  $\leftarrow$  array of integers of length  $L$

*countArrayMax*  $\leftarrow$  array of integers of length  $L$

**for**  $i \leftarrow 0$  **to**  $L - 1$

$\begin{cases} O \leftarrow \text{get element of } \mathcal{S} \text{ in position } i \\ \text{do } \begin{cases} \text{countArrayMax}[i] \leftarrow \text{length of list } O \\ \text{countArray}[i] \leftarrow 0 \end{cases} \end{cases}$

**repeat**

$\begin{cases} \text{ControlSet} \leftarrow \text{empty set} \\ \text{for } i \leftarrow 0 \text{ to } L - 1 \\ \text{do } \begin{cases} O \leftarrow \text{get element of } \mathcal{S} \text{ in position } i \\ M \leftarrow \text{get element of } O \text{ in position } \text{countArray}[i] \\ \text{do for each } \sigma \in M \\ \text{do add } \sigma \text{ to } \text{ControlSet} \end{cases} \end{cases}$

**do**  $\begin{cases} \text{add } \text{ControlSet} \text{ to } \text{ControlSets} \\ \text{comment: } \text{index gets increased whenever } \text{countArray}[\text{index}] \text{ reaches its max value, } \text{countArrayMax}[\text{index}]. \\ \text{index} \leftarrow 0 \\ \text{repeat} \\ \begin{cases} \text{comment: } \text{increasedIndex breaks the repeat loop.} \\ \text{increasedIndex} \leftarrow \text{false} \\ \text{countArray}[\text{index}] \leftarrow \text{countArray}[\text{index}] + 1 \\ \text{if } \text{countArray}[\text{index}] \text{ equals } \text{countArrayMax}[\text{index}] \\ \text{then } \begin{cases} \text{countArray}[\text{index}] \leftarrow 0 \\ \text{index} \leftarrow \text{index} + 1 \\ \text{increasedIndex} \leftarrow \text{true} \end{cases} \\ \text{if } \text{index equals } L \\ \text{then exit repeat loop} \end{cases} \\ \text{until not increasedIndex} \end{cases}$

**until** *index* equals  $L$

**return** (*ControlSets*)

---

---

**Algorithm 7:** PRUNECONTROLSSETS(*ControlSets*)

---

**comment:** *PrunedControlSets* is a set  
*PrunedControlSets*  $\leftarrow$  copy *ControlSets*  
**for each** *ControlSet*  $\in$  *ControlSets*  
  **do**  $\left\{ \begin{array}{l} \textbf{for each } \textit{ControlSet}' \in \textit{ControlSets} \\ \textbf{do} \left\{ \begin{array}{l} \textbf{if } \textit{ControlSet}' \text{ is not } \textit{ControlSet} \\ \textbf{then} \left\{ \begin{array}{l} \textbf{if } \textit{ControlSet}' \text{ is a subset of } \textit{ControlSet} \\ \textbf{then} \left\{ \begin{array}{l} \text{remove } \textit{ControlSet} \text{ from } \textit{PrunedControlSets} \\ \text{exit for loop} \end{array} \right. \end{array} \right. \end{array} \right. \end{array} \right.$   
**return** (*PrunedControlSets*)

---

### B. Pseudocode for the stable motif blocking algorithm

*Step 1:* Identify the sequences of stable motifs that lead to  $\mathcal{A}$ . This step is the same as the first step in the stable motif control algorithm (Algorithm 1), and can be obtained from the stable motif succession diagram (Fig. 2).

*Step 2:* Take each stable motif's state  $\mathcal{M}_i$  in the sequences obtained in the previous step (*Sequences*). Create a new set  $\mathbf{M}_{\mathcal{A}}$  with all of these stable motif states,  $\mathbf{M}_{\mathcal{A}} = \{\mathcal{M}_i\}$ .

---

**Algorithm 8:** MOTIFSTATES(*Sequences*, *L*)

---

**comment:**  $\mathbf{M}_{\mathcal{A}}$  and  $\mathcal{M}$  are sets.  
 $\mathbf{M}_{\mathcal{A}} \leftarrow$  empty set  
**for each**  $\mathcal{S} \in \textit{Sequences}$   
  **do**  $\left\{ \begin{array}{l} \textbf{for each } v \in \mathcal{S} \text{ s.t. } v \text{ is not a sink node} \\ \textbf{do} \left\{ \begin{array}{l} \textbf{comment: } \mathcal{M} \text{ stores the states of the motif } L(v). \\ \mathcal{M} \leftarrow L(v) \\ \text{add } \mathcal{M} \text{ to } \mathbf{M}_{\mathcal{A}} \end{array} \right. \end{array} \right.$   
**return** ( $\mathbf{M}_{\mathcal{A}}$ )

---

*Step 3:* Take each node state  $\sigma_j \in \mathcal{M}_i$  of the stable motif's states  $\mathcal{M}_i$  in  $\mathbf{M}_{\mathcal{A}}$ . Create a new set  $\mathcal{B}_{\mathcal{A}}$  with the negation of each node state,  $\mathcal{B}_{\mathcal{A}} = \{\bar{\sigma}_j\}$ . The node states in  $\mathcal{B}_{\mathcal{A}}$  and any combination of them are identified as potential interventions to block attractor  $\mathcal{A}$ .

---

**Algorithm 9:** STABLEMOTIFBLOCKING( $\mathbf{M}_{\mathcal{A}}$ )

---

**comment:**  $\mathcal{B}_{\mathcal{A}}$  is a set.  
 $\mathcal{B}_{\mathcal{A}} \leftarrow$  empty set  
**for each**  $\sigma \in \mathbf{M}_{\mathcal{A}}$   
  **do**  $\left\{ \begin{array}{l} \textbf{comment: } \sigma' \text{ is a node in the logical model together with a Boolean variable with its state.} \\ \sigma' \leftarrow \text{reverse node state of } \sigma \\ \text{add } \sigma' \text{ to } \mathcal{B}_{\mathcal{A}} \end{array} \right.$   
**return** ( $\mathcal{B}_{\mathcal{A}}$ )

---
