# Supplementary material for: Cell Fate Reprogramming by Control of Intracellular Network Dynamics
Source: PLOS journal article supplement (doi:10.1371/journal.pcbi.1004193), 2015-04-07
Supplement: S8 (10.1371/journal.pcbi.1004193.s008) [file journal.pcbi.1004193.s008]

## Supporting Information

### S8 TEXT. LIST OF REFERENCES THAT APPEAR IN THE SUPPORTING INFORMATION FILES

- [S1] Wang RS and Albert R (2011) Elementary signaling modes predict the essentiality of signal transduction network components. *BMC Systems Biology* 5, 44.
- [S2] Saadatpour A, Albert R, and Reluga T (2013) A reduction method for Boolean network models proven to conserve attractors. *SIAM J. Appl. Dyn. Syst.* 12(4), 19972011.
- [S3] Naldi A, Monteiro PT, Müssel C, Kestler HA, Thieffry D, et al. (2014) Cooperative development of logical modelling standards and tools with CoLoMoTo. *bioRxiv* doi: 10.1101/010504.
- [S4] Aldana-Gonzalez M, Coppersmith S, and Kadanoff LP (2003) Boolean Dynamics with Random Couplings. In *Perspectives and Problems in Nonlinear Science. A celebratory volume in honor of Lawrence Sirovich*, Springer Applied Mathematical Sciences Series. Ehud Kaplan, Jerrold E. Marsden, and Katepalli R. Sreenivasan Eds., 23-89.
- [S5] McCluskey EJ (1956) Minimization of Boolean Functions. *Bell System Technical Journal* 35 (6), 14171444.
- [S6] Quine WV (1952) The Problem of Simplifying Truth Functions. *The American Mathematical Monthly* 59 (8), 521531
- [S7] Quine WV (1955) A Way to Simplify Truth Functions. *The American Mathematical Monthly* 62 (9), 627631.
- [S8] Coudert O (1994) Two-level logic minimization: an overview. *Integration, the VLSI Journal* 17 (2), 97140.
- [S9] Chandra AK and Markowsky G (1978) On the number of prime implicants. *Discrete Mathematics* 24 (1), 711.
- [S10] McMullen C and Shearer J (1986) Prime Implicants, Minimum Covers, and the Complexity of Logic Simplification. *IEEE Transactions on Computers* archive 35 (8), 761-762.
- [S11] Strzemecki T (1992) Polynomial-time algorithms for generation of prime implicants. *Journal of Complexity* 8 (1), 376.
- [S12] Johnson DB (1975) Finding All the Elementary Circuits of a Directed Graph. *SIAM J. Comput.* 4 (1), 77-84.
- [S13] De Jong H, Gouzé JL, Hernandez C, Page M, Sari T, and Geiselmann J (2004) Qualitative simulation of genetic regulatory networks using piecewise-linear models. *Bull. Math. Biol.* 66 (2), 301-340.
- [S14] Snoussi EH (1989) Qualitative dynamics of piecewise-linear differential equations: a discrete mapping approach. *Dynamics and Stability of Systems* 4 (3-4), 189-207.
- [S15] Casey R, de Jong H, and Gouzé JL (2006) Piecewise-linear models of genetic regulatory networks: equilibria and their stability. *J. Math. Biol.* 52 (1), 27-56.
- [S16] Farcot E and Gouzé JL (2009) Periodic solutions of piecewise affine gene network models with non uniform decay rates: the case of a negative feedback loop. *Acta Biotheor.* 57, 429-455.
- [S17] Chaves M and Preto M (2013) Hierarchy of models: From qualitative to quantitative analysis of circadian rhythms in cyanobacteria. *Chaos* 23 (2), 025113.
- [S18] Dormand JR and Prince PJ (1980) A family of embedded Runge-Kutta formulae. *J. Comp. Appl. Math.* 6, 1926.
