# Supplementary material for: Cell Fate Reprogramming by Control of Intracellular Network Dynamics
Source: PLOS journal article supplement (doi:10.1371/journal.pcbi.1004193), 2015-04-07

(a)

$$f_A = (\text{NOT } A \text{ AND NOT } B) \\ \text{OR } (A \text{ AND } B)$$

$$f_B = (\text{NOT } A \text{ AND NOT } B) \\ \text{OR } (A \text{ AND } B)$$

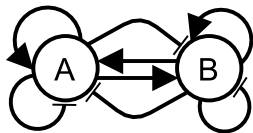

(b)

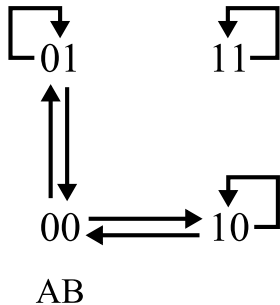

(c)

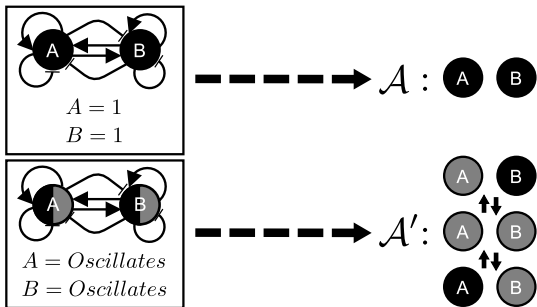

Supplement: S11 (10.1371/journal.pcbi.1004193.s011) [file journal.pcbi.1004193.s011]
