# Supplementary material for: Cell Fate Reprogramming by Control of Intracellular Network Dynamics
Source: PLOS journal article supplement (doi:10.1371/journal.pcbi.1004193), 2015-04-07

(a)

$$f_C = (A \text{ AND } B) \text{ OR } D$$

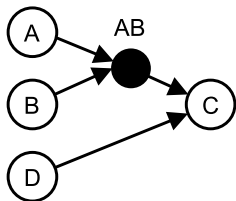

$$f_{\bar{C}} = (\text{NOT } D \text{ AND NOT } A) \\ \text{OR } (\text{NOT } D \text{ AND NOT } B)$$

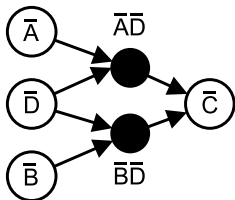

(b)

$$f_B = A \text{ OR } C \text{ OR NOT } E$$

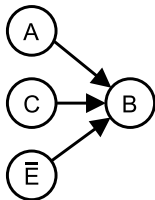

$$f_{\bar{B}} = \text{NOT } A \text{ AND NOT } C \text{ AND } E$$

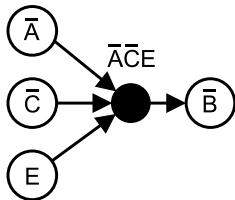

Supplement: S13 (10.1371/journal.pcbi.1004193.s013) [file journal.pcbi.1004193.s013]
